# Supplementary material
Source: PubMed Central journal article supplement (PMC10407692)
Supplement: djad098_supplementary_data.pdf [file djad098_supplementary_data.pdf]

## Supplementary Tables

**Supplementary Table 1.** Unadjusted restricted mean survival time (RMST), median, and 5-year all-cause survival estimates for patients diagnosed with lung cancer, 2010-2019

|                                    | Never Smokers                     |                 |                 | Former Smokers                    |                 |                 | Current Smokers                   |                 |                 | TOTAL                             |                 |                 |               |
|------------------------------------|-----------------------------------|-----------------|-----------------|-----------------------------------|-----------------|-----------------|-----------------------------------|-----------------|-----------------|-----------------------------------|-----------------|-----------------|---------------|
|                                    | RMST Through 5 years <sup>a</sup> | Median Survival | 5-year survival | RMST Through 5 years <sup>a</sup> | Median Survival | 5-year survival | RMST Through 5 years <sup>a</sup> | Median Survival | 5-year survival | RMST Through 5 years <sup>a</sup> | Median Survival | 5-year survival | Log-Rank Test |
|                                    | (months)                          | (months)        | %               | p-value       |
| Overall                            | 32.1                              | 29.0            | 33.6%           | 25.9                              | 16.1            | 24.3%           | 23.3                              | 13.0            | 19.7%           | 25.9                              | 16.2            | 24.1%           |               |
| Sex                                |                                   |                 |                 |                                   |                 |                 |                                   |                 |                 |                                   |                 |                 | < .001        |
| Female                             | 35.0                              | 39.3            | 36.6%           | 29.1                              | 21.3            | 29.1%           | 25.8                              | 15.5            | 24.1%           | 29.1                              | 21.4            | 28.8%           |               |
| Male                               | 25.9                              | 16.4            | 27.2%           | 22.7                              | 12.4            | 19.3%           | 20.5                              | 10.8            | 15.3%           | 22.3                              | 12.0            | 18.7%           |               |
| Race and Ethnicity                 |                                   |                 |                 |                                   |                 |                 |                                   |                 |                 |                                   |                 |                 | < .001        |
| Asian                              | 31.0                              | 28.6            | 32.1%           | 22.7                              | 12.3            | 19.5%           | 18.0                              | 11.0            | 9.6%            | 24.4                              | 14.9            | 21.6%           |               |
| Hispanic                           | 32.0                              | 25.7            | 38.9%           | 24.7                              | 14.4            | 21.8%           | 21.5                              | 14.5            | 11.6%           | 24.9                              | 14.9            | 20.6%           |               |
| Native Hawaiian/Pac Islander       | 34.1                              | 45.5            | 40.4%           | 24.8                              | 13.4            | 25.7%           | 23.7                              | 12.9            | 20.0%           | 25.6                              | 15.2            | 25.5%           |               |
| Black                              | 34.0                              | 32.3            | 28.6%           | 29.7                              | 23.3            | 28.6%           | 24.9                              | 14.9            | 22.8%           | 28.2                              | 19.7            | 26.3%           |               |
| White                              | 32.5                              | 29.3            | 35.4%           | 25.8                              | 15.9            | 24.3%           | 23.7                              | 13.2            | 21.0%           | 26.0                              | 16.1            | 24.7%           |               |
| Other/UNK                          | 22.9                              | 16.5            | 13.0%           | 23.6                              | 15.2            | 18.7%           | 15.7                              | 6.3             | 8.0%            | 20.8                              | 13.1            | 14.0%           |               |
| Age at Lung Ca Dx (years)          |                                   |                 |                 |                                   |                 |                 |                                   |                 |                 |                                   |                 |                 | < .001        |
| 40 - 54                            | 39.9                              | 53.6            | 44.5%           | 31.4                              | 25.4            | 31.5%           | 24.1                              | 14.6            | 18.6%           | 29.6                              | 23.4            | 27.7%           |               |
| 55 - 64                            | 38.4                              | 45.1            | 44.3%           | 30.6                              | 24.1            | 34.1%           | 26.6                              | 18.4            | 25.4%           | 29.8                              | 22.8            | 31.4%           |               |
| 65 - 74                            | 33.8                              | 33.9            | 39.2%           | 28.0                              | 18.5            | 27.1%           | 23.1                              | 13.0            | 19.3%           | 27.1                              | 16.8            | 25.9%           |               |
| 75 - 89                            | 25.5                              | 17.5            | 21.1%           | 22.0                              | 13.5            | 17.8%           | 18.3                              | 7.9             | 13.2%           | 21.8                              | 12.4            | 17.4%           |               |
| Yost State Quintile (census based) |                                   |                 |                 |                                   |                 |                 |                                   |                 |                 |                                   |                 |                 | < .001        |

|                                                      |      |      |       |      |      |       |      |      |       |      |      |       |        |
|------------------------------------------------------|------|------|-------|------|------|-------|------|------|-------|------|------|-------|--------|
| Quintile 1 (lowest)                                  | 31.5 | 30.5 | 30.7% | 25.6 | 15.8 | 21.4% | 22.0 | 12.4 | 15.3% | 24.8 | 15.2 | 19.9% |        |
| Quintile 2                                           | 27.1 | 19.0 | 23.7% | 23.8 | 14.3 | 20.1% | 24.9 | 13.6 | 25.3% | 24.6 | 14.7 | 22.2% |        |
| Quintile 3                                           | 30.5 | 22.7 | 35.8% | 26.0 | 17.6 | 22.6% | 23.1 | 14.3 | 17.2% | 25.6 | 17.0 | 22.2% |        |
| Quintile 4                                           | 32.5 | 30.2 | 29.2% | 26.4 | 16.7 | 26.4% | 23.3 | 11.8 | 22.4% | 26.5 | 16.6 | 26.0% |        |
| Quintile 5 (highest)                                 | 36.7 | 45.1 | 43.8% | 27.8 | 17.2 | 31.2% | 24.2 | 13.4 | 24.2% | 28.7 | 19.5 | 31.9% |        |
|                                                      |      |      |       |      |      |       |      |      |       |      |      |       |        |
| RUCA (census based)                                  |      |      |       |      |      |       |      |      |       |      |      |       | < .001 |
| Urban Focused                                        | 33.2 | 30.5 | 35.4% | 26.4 | 16.7 | 25.6% | 23.4 | 13.1 | 20.2% | 26.3 | 16.7 | 25.2% |        |
| Large Rural City/Town                                | 28.4 | 24.1 | 18.5% | 23.0 | 12.9 | 16.5% | 21.0 | 11.7 | 17.5% | 23.2 | 13.6 | 17.8% |        |
| Small Rural Town focused/Isolated small rural        | 25.0 | 11.3 | 27.9% | 23.2 | 13.3 | 16.6% | 24.1 | 15.3 | 18.8% | 23.8 | 13.6 | 18.9% |        |
|                                                      |      |      |       |      |      |       |      |      |       |      |      |       |        |
| Percent with associate degree or more (Census based) |      |      |       |      |      |       |      |      |       |      |      |       | 0.007  |
| Quartile 1 (Lowest)                                  | 29.5 | 23.0 | 28.9% | 24.5 | 15.5 | 20.4% | 23.4 | 13.0 | 20.0% | 24.5 | 14.9 | 21.1% |        |
| Quartile 2                                           | 30.3 | 26.2 | 25.9% | 25.9 | 15.5 | 23.1% | 22.7 | 13.6 | 18.3% | 25.3 | 15.5 | 21.8% |        |
| Quartile 3                                           | 32.3 | 28.5 | 38.9% | 27.3 | 19.4 | 25.8% | 23.3 | 12.6 | 21.7% | 26.8 | 17.0 | 26.1% |        |
| Quartile 4 (Highest)                                 | 34.7 | 31.9 | 39.0% | 26.0 | 15.5 | 27.2% | 24.1 | 13.5 | 20.2% | 27.1 | 17.5 | 27.6% |        |
|                                                      |      |      |       |      |      |       |      |      |       |      |      |       |        |
| Percent Below Poverty, Census based, N (%)           |      |      |       |      |      |       |      |      |       |      |      |       | < .001 |
| Quartile 1 (Lowest)                                  | 35.5 | 41.4 | 39.6% | 26.8 | 15.9 | 28.8% | 24.3 | 12.7 | 22.4% | 27.6 | 17.7 | 28.9% |        |
| Quartile 2                                           | 33.3 | 33.9 | 36.7% | 26.8 | 18.3 | 25.0% | 22.7 | 13.5 | 20.5% | 26.5 | 16.8 | 25.4% |        |
| Quartile 3                                           | 29.4 | 23.6 | 29.6% | 24.3 | 14.9 | 20.4% | 24.3 | 15.2 | 19.2% | 25.0 | 15.7 | 21.2% |        |
| Quartile 4 (Highest)                                 | 27.9 | 22.4 | 24.0% | 25.9 | 16.5 | 22.5% | 22.2 | 11.7 | 18.0% | 24.7 | 14.9 | 20.9% |        |
|                                                      |      |      |       |      |      |       |      |      |       |      |      |       |        |

|                                                    |      |      |       |      |      |       |      |      |       |      |      |       |        |        |
|----------------------------------------------------|------|------|-------|------|------|-------|------|------|-------|------|------|-------|--------|--------|
| AJCC Stage                                         |      |      |       |      |      |       |      |      |       |      |      |       |        | < .001 |
| I                                                  | 52.6 | NA   | 76.1% | 44.4 | 64.3 | 52.8% | 45.8 | 67.0 | 53.2% | 46.0 | 71.0 | 56.4% |        |        |
| II                                                 | 46.1 | 64.9 | 59.5% | 34.5 | 34.0 | 33.1% | 37.3 | 45.1 | 42.9% | 36.8 | 38.2 | 39.5% |        |        |
| III                                                | 30.4 | 28.3 | 19.4% | 25.8 | 17.7 | 21.2% | 25.3 | 18.3 | 17.3% | 26.0 | 18.9 | 19.7% |        |        |
| IV                                                 | 17.4 | 9.7  | 7.6%  | 11.5 | 5.7  | 4.9%  | 11.0 | 5.8  | 3.8%  | 12.2 | 6.1  | 4.9%  |        |        |
| Missing/Unknown                                    | 29.8 | 20.7 | 24.8% | 20.7 | 12.7 | 6.7%  | 23.2 | 9.6  | 19.8% | 22.7 | 13.8 | 14.1% |        |        |
|                                                    |      |      |       |      |      |       |      |      |       |      |      |       |        |        |
| Histology                                          |      |      |       |      |      |       |      |      |       |      |      |       |        | 0.001  |
| Adenocarcinoma                                     | 34.1 | 33.2 | 35.0% | 29.7 | 22.5 | 29.7% | 27.8 | 20.1 | 24.9% | 30.0 | 23.6 | 29.4% |        |        |
| Large Cell                                         | NA   | 19.1 | 20.5% | 24.0 | 19.5 | 16.9% | 28.3 | 13.0 | 39.6% | 26.0 | 19.1 | 29.5% |        |        |
| NSCLC/Other                                        | 24.9 | 12.6 | 25.2% | 20.7 | 10.0 | 19.6% | 20.3 | 7.7  | 18.7% | 21.0 | 9.4  | 20.1% |        |        |
| Squamous                                           | 17.2 | 8.7  | 9.7%  | 27.2 | 19.1 | 22.5% | 23.1 | 14.6 | 19.1% | 25.2 | 16.7 | 20.4% |        |        |
| Small cell                                         | NA   | 10.2 | 3.4%  | 13.7 | 7.8  | 6.5%  | 15.8 | 9.5  | 8.9%  | 14.6 | 8.6  | 7.5%  |        |        |
| Carcinoids                                         | 53.3 | NA   | 79.4% | 43.0 | 67.6 | 59.9% | 30.6 | 27.3 | 33.3% | 46.0 | NA   | 65.3% |        |        |
|                                                    |      |      |       |      |      |       |      |      |       |      |      |       |        |        |
| Modified Charlson Index <sup>b</sup>               |      |      |       |      |      |       |      |      |       |      |      |       |        | < .001 |
| 0 – 1 condition                                    | 36.3 | 43.3 | 39.2% | 30.2 | 21.7 | 32.0% | 25.9 | 16.9 | 23.0% | 29.8 | 21.7 | 30.2% |        |        |
| 2 or more conditions                               | 29.6 | 24.0 | 30.3% | 24.6 | 14.9 | 21.7% | 22.1 | 11.5 | 18.5% | 24.4 | 14.6 | 21.7% |        |        |
|                                                    |      |      |       |      |      |       |      |      |       |      |      |       |        |        |
| Receipt of Other First Course Therapy <sup>c</sup> |      |      |       |      |      |       |      |      |       |      |      |       |        |        |
| Radiation                                          | 25.9 | 20.2 | 14.9% | 25.5 | 17.2 | 19.9% | 23.0 | 15.0 | 15.5% | 24.7 | 16.6 | 17.9% | < .001 |        |
| Systemic Therapy                                   | 27.1 | 21.4 | 17.8% | 23.9 | 15.2 | 17.5% | 23.4 | 14.6 | 17.4% | 24.1 | 15.3 | 17.5% | < .001 |        |
| Surgery                                            | 52.6 | NA   | 75.0% | 48.7 | 90.3 | 63.1% | 47.5 | 74.9 | 61.0% | 49.1 | 89.5 | 64.6% | < .001 |        |
|                                                    |      |      |       |      |      |       |      |      |       |      |      |       |        |        |
| BMI Status as of Dx Date                           |      |      |       |      |      |       |      |      |       |      |      |       |        | < .001 |
| < 25 (Underweight/Normal)                          | 29.1 | 23.9 | 28.7% | 22.3 | 12.0 | 19.6% | 21.9 | 11.4 | 18.2% | 22.9 | 12.3 | 20.1% |        |        |
| 25 - 29 (Overweight)                               | 30.9 | 25.2 | 30.6% | 26.8 | 17.3 | 24.7% | 24.3 | 14.7 | 20.5% | 26.6 | 17.3 | 24.3% |        |        |
| 30 + (Obese)                                       | 37.2 | 45.5 | 44.1% | 30.2 | 22.7 | 30.5% | 26.0 | 16.1 | 24.2% | 30.4 | 23.3 | 31.2% |        |        |

|         |      |     |       |    |     |      |      |     |       |      |     |      |  |
|---------|------|-----|-------|----|-----|------|------|-----|-------|------|-----|------|--|
| Missing | 27.5 | 9.2 | 15.0% | NA | 6.5 | 8.1% | 17.2 | 9.5 | 13.1% | 16.9 | 9.2 | 9.4% |  |
|---------|------|-----|-------|----|-----|------|------|-----|-------|------|-----|------|--|

Abbreviations: NA = not applicable; NA = Not Applicable

<sup>a</sup>The coefficient value represents the number of additional months of survival gained or lost if the corresponding characteristics were present relative to the reference group for that covariate

<sup>b</sup> Modified Charlson Comorbidity Index excludes HIV/AIDS diagnoses

<sup>c</sup> First Course Therapy as documented in Tumor Registry data

**Supplementary Table 2.** Multivariable Adjusted Restricted Mean Survival Time among patients with Adenocarcinoma histology<sup>a</sup>

|                                           | Never Smokers<br>(N = 587)        | Former Smokers<br>(N = 1714)      | Current Smokers<br>(N = 864)      | All Adenocarcinoma<br>Histology   |
|-------------------------------------------|-----------------------------------|-----------------------------------|-----------------------------------|-----------------------------------|
|                                           | Coefficient (95% CI) <sup>b</sup> |
| Intercept                                 | 40.4 (30.4 to 50.3)               | 38.4 (31.8 to 45.0)               | 39.3 (32.2 to 46.5)               | 41.7 (36.9 to 46.4)               |
| <b>Smoking Status</b>                     |                                   |                                   |                                   |                                   |
| Never                                     | NA                                | NA                                | NA                                | Ref                               |
| Current                                   | NA                                | NA                                | NA                                | -3.8 (-6.1 to -1.6)               |
| Former                                    | NA                                | NA                                | NA                                | -3.4 (-5.4 to -1.5)               |
| <b>Sex</b>                                |                                   |                                   |                                   |                                   |
| Female                                    | Ref                               | Ref                               | Ref                               | Ref                               |
| Male                                      | -5.2 (-9.0 to -1.4)               | -2.6 (-4.6 to -0.5)               | -3.4 (-6.0 to -0.7)               | -3.4 (-4.9 to -1.9)               |
| <b>Race and Ethnicity</b>                 |                                   |                                   |                                   |                                   |
| White                                     | Ref                               | Ref                               | Ref                               | Ref                               |
| Asian                                     | -2.8 (-9.1 to 3.5)                | -2.4 (-7.6 to 2.8)                | 1.0 (-6.8 to 8.7)                 | -0.8 (-4.3 to 2.8)                |
| Native Hawaiian / Pacific Islander        | -3.6 (-14.3 to 7.1)               | 1.6 (-4.8 to 7.9)                 | 4.4 (-3.5 to 12.3)                | 1.3 (-3.3 to 5.9)                 |
| Hispanic                                  | -2.6 (-12.5 to 7.4)               | 0.7 (-4.9 to 6.4)                 | -3.1 (-9.1 to 3.0)                | -0.5 (-4.6 to 3.5)                |
| Black                                     | 3.1 (-3.6 to 9.7)                 | 3.4 (-0.2 to 7.0)                 | 1.9 (-2.1 to 5.9)                 | 2.9 (0.4 to 5.4)                  |
| Other/Unknown                             | -4.5 (-13.3 to 4.3)               | -0.01 (-4.5 to 4.4)               | -6.2 (-10.8 to -1.5)              | -2.4 (-5.5 to 0.7)                |
| <b>Age at Lung Ca Dx (years)</b>          |                                   |                                   |                                   |                                   |
| 75 – 89                                   | Ref                               | Ref                               | Ref                               | Ref                               |
| 40 – 54                                   | 7.7 (1.5 to 14.0)                 | 8.0 (2.6 to 13.3)                 | 1.6 (-3.4 to 6.6)                 | 4.8 (1.8 to 7.9)                  |
| 55 - 64                                   | 7.2 (2.5 to 11.9)                 | -0.3 (-3.2 to 2.5)                | 4.3 (0.5 to 8.1)                  | 2.8 (0.8 to 4.9)                  |
| 65 - 74                                   | 0.8 (-3.1 to 4.8)                 | 1.1 (-1.2 to 3.3)                 | -0.9 (-4.7 to 2.8)                | 0.6 (-1.1 to 2.4)                 |
| <b>Yost State Quintile (census based)</b> |                                   |                                   |                                   |                                   |
| 1 (lowest)                                | Ref                               | Ref                               | Ref                               | Ref                               |
| 2                                         | -1.2 (-6.7 to 4.3)                | 1.0 (-2.0 to 4.1)                 | 5.2 (1.3 to 9.2)                  | 1.9 (-0.3 to 4.1)                 |
| 3                                         | 0.5 (-5.3 to 6.3)                 | 2.2 (-1.0 to 5.4)                 | 2.4 (-1.3 to 6.1)                 | 1.9 (-0.4 to 4.1)                 |
| 4                                         | 0.5 (-4.6 to 5.5)                 | 2.4 (-0.8 to 5.7)                 | 6.1 (1.9 to 10.3)                 | 3.1 (0.8 to 5.4)                  |
| 5 (highest)                               | 3.7 (-1.7 to 9.2)                 | 3.6 (0.2 to 7.0)                  | 2.3 (-2.1 to 6.8)                 | 3.4 (0.9 to 5.8)                  |

|                                                       |                        |                        |                        |                        |
|-------------------------------------------------------|------------------------|------------------------|------------------------|------------------------|
| RUCA (census based)                                   |                        |                        |                        |                        |
| Urban Focused                                         | Ref                    | Ref                    | Ref                    | Ref                    |
| Large Rural City/Town                                 | -0.8 (-8.3 to 6.7)     | 1.4 (-4.4 to 7.3)      | -3.6 (-11.2 to 4.0)    | -0.3 (-4.3 to 3.8)     |
| Small Rural Town<br>focused/Isolated small rural      | 1.6 (-7.7 to 11.0)     | 2.1 (-4.1 to 8.3)      | -1.0 (-9.9 to 7.8)     | 1.1 (-3.4 to 5.6)      |
| AJCC Stage at Diagnosis                               |                        |                        |                        |                        |
| I                                                     | Ref                    | Ref                    | Ref                    | Ref                    |
| II                                                    | -10.8 (-18.7 to -2.9)  | -12.0 (-16.6 to -7.5)  | -9.6 (-16.0 to -3.2)   | -11.4 (-14.7 to -8.0)  |
| III                                                   | -19.3 (-26.7 to -11.9) | -17.2 (-21.3 to -13.0) | -19.5 (-25.0 to -14.0) | -18.3 (-21.3 to -15.2) |
| IV                                                    | -35.6 (-42.5 to -28.7) | -29.0 (-32.5 to -25.6) | -33.3 (-37.8 to -28.9) | -30.9 (-33.5 to -28.3) |
| Other/Unknown                                         | -15.0 (-24.3 to -5.7)  | -16.6 (-22.6 to -10.6) | -18.5 (-25.6 to -11.4) | -16.7 (-20.9 to -12.5) |
| Clinical Conditions                                   |                        |                        |                        |                        |
| No Previous non-lung cancer                           | Ref                    | Ref                    | Ref                    | Ref                    |
| Previous non-lung cancer                              | -5.3 (-10.2 to -0.4)   | 0.00 (-2.9 to 2.9)     | -4.8 (-8.5 to -1.2)    | -2.0 (-4.1 to 0.1)     |
| Charlson Co-morbidity Index <sup>c</sup>              |                        |                        |                        |                        |
| 0 – 1 condition                                       | Ref                    | Ref                    | Ref                    | Ref                    |
| 2 or more conditions                                  | -2.3 (-6.2 to 1.7)     | -3.0 (-5.3 to -0.7)    | -1.8 (-4.8 to 1.2)     | -2.6 (-4.3 to -0.9)    |
| Receipt of Other First Course<br>Therapy <sup>d</sup> |                        |                        |                        |                        |
| No Radiation                                          | Ref                    | Ref                    | Ref                    | Ref                    |
| Radiation                                             | -2.5 (-7.1 to 2.1)     | 1.2 (-1.2 to 3.7)      | 0.4 (-2.8 to 3.6)      | 0.1 (-1.7 to 1.9)      |
| No Surgery                                            | Ref                    | Ref                    | Ref                    | Ref                    |
| Surgery                                               | 5.3 (-0.9 to 11.4)     | 15.2 (11.9 to 18.6)    | 11.7 (7.2 to 16.2)     | 12.9 (10.4 to 15.4)    |
| No Systemic Therapy                                   | Ref                    | Ref                    | Ref                    | Ref                    |
| Systemic Therapy                                      | 9.5 (5.5 to 13.4)      | 8.1 (5.6 to 10.5)      | 10.0 (7.0 to 12.9)     | 9.0 (7.3 to 10.7)      |
| BMI Status at diagnosis                               |                        |                        |                        |                        |
| < 25 (Underweight/Normal)                             | Ref                    | Ref                    | Ref                    | Ref                    |
| 25 – 29 (Overweight)                                  | -1.4 (-5.4 to 2.7)     | 1.9 (-0.3 to 4.2)      | 0.8 (-2.3 to 3.9)      | 1.1 (-0.5 to 2.8)      |
| 30 + (Obese)                                          | 1.7 (-2.6 to 6.0)      | 1.9 (-0.7 to 4.5)      | 2.1 (-1.6 to 5.8)      | 1.8 (-0.1 to 3.7)      |
| Unknown                                               | 6.9 (-14.9 to 28.6)    | -11.5 (-25.2 to 2.2)   | -8.6 (-17.1 to -0.1)   | -5.0 (-12.0 to 1.9)    |

Abbreviations: Ref = reference group in multivariable model.

<sup>a</sup> Results mutually adjusted for year of diagnosis and healthcare system in addition to all variables listed in the table

<sup>b</sup> The coefficient value represents the number of additional months of survival gained or lost if the corresponding characteristics were present relative to the reference group for that covariate.

<sup>c</sup> Modified Charlson Comorbidity Index excludes HIV/AIDS diagnoses

<sup>d</sup> First Course Therapy as documented in Tumor Registry data

**Supplementary Table 3.** Multivariable models of restricted mean lung cancer cause of death survival time through 5 years from time of diagnosis stratified by Smoking Status<sup>a</sup>

|                                    | Patients who Never Smoked         | Patients who Formerly Smoked      | Patients who Currently Smoke      | All Lung Cancer Patients          | Smoking Status Comparison |
|------------------------------------|-----------------------------------|-----------------------------------|-----------------------------------|-----------------------------------|---------------------------|
|                                    | Coefficient (95% CI) <sup>b</sup> | Interaction P-value       |
| Intercept                          | 36.3 (25.8 to 46.7)               | 40.1 (34.9 to 45.4)               | 39.4 (33.3 to 45.5)               | 41.5 (37.4 to 45.6)               |                           |
| Smoking Status                     |                                   |                                   |                                   |                                   |                           |
| Never                              | NA                                | NA                                | NA                                | Ref                               |                           |
| Current                            | NA                                | NA                                | NA                                | -3.8 (-5.9 to -1.7)               |                           |
| Former                             | NA                                | NA                                | NA                                | -2.1 (-4 to -0.3)                 |                           |
| Sex                                |                                   |                                   |                                   |                                   | 0.047                     |
| Female                             | Ref                               | Ref                               | Ref                               | Ref                               |                           |
| Male                               | -1.3 (-4.9 to 2.2)                | -1.6 (-3.3 to 0.1)                | -4.6 (-6.7 to -2.5)               | -2.7 (-3.9 to -1.4)               |                           |
| Race and Ethnicity                 |                                   |                                   |                                   |                                   | 0.38                      |
| White                              | Ref                               | Ref                               | Ref                               | Ref                               |                           |
| Asian                              | -3.2 (-9.2 to 2.9)                | 1.4 (-2.8 to 5.6)                 | -2.1 (-8.4 to 4.2)                | 0.5 (-2.6 to 3.5)                 |                           |
| Hispanic                           | -4.3 (-14.9 to 6.4)               | 3.5 (-1.6 to 8.6)                 | 3.4 (-2.4 to 9.2)                 | 2.7 (-0.996 to 6.3)               |                           |
| Native Hawaiian/Pacific Islander   | -1.3 (-8.8 to .2)                 | 2.1 (-2.3 to 6.5)                 | -3.0 (-7.6 to 1.7)                | -0.4 (-3.4 to 2.7)                |                           |
| Black                              | 7.4 (1.7 to 13.2)                 | 3.2 (-0.3 to 6.7)                 | 0.9 (-2.6 to 4.5)                 | 3.0 (0.7 to 5.3)                  |                           |
| Other/Unknown                      | 2.4 (-4.7 to 9.5)                 | 0.5 (-3.5 to 4.5)                 | -5.6 (-9.7 to -1.4)               | -1.5 (-4.2 to 1.2)                |                           |
| Age at Lung Ca Dx (years)          |                                   |                                   |                                   |                                   | 0.12                      |
| 75 - 89                            | Ref                               | Ref                               | Ref                               | Ref                               |                           |
| 40 - 54                            | 8.0 (2.0 to 13.9)                 | 6.4 (1.6 to 11.1)                 | 2.5 (-1.8 to 6.9)                 | 4.9 (2.1 to 7.7)                  |                           |
| 55 - 64                            | 6.0 (1.3 to 10.6)                 | 1.5 (-1.0 to 4.0)                 | 4.0 (0.993 to 7.1)                | 3.7 (1.9 to 5.4)                  |                           |
| 65 - 74                            | 2.2 (-1.6 to 6.0)                 | 2.2 (0.3 to 4.0)                  | -0.2 (-3.0 to 2.7)                | 1.7 (0.3 to 3.1)                  |                           |
| Yost State Quintile (census based) |                                   |                                   |                                   |                                   | 0.06                      |
| Yost 1 (lowest)                    | Ref                               | Ref                               | Ref                               | Ref                               |                           |
| Yost2                              | -0.9 (-5.7 to 3.9)                | 0.9 (-1.6 to 3.3)                 | 3.9 (0.9 to 6.9)                  | 1.7 (-0.1 to 3.4)                 |                           |
| Yost3                              | 5.6 (0.5 to 10.8)                 | -0.1 (-2.7 to 2.4)                | 0.4 (-2.7 to 3.4)                 | 0.6 (-1.2 to 2.5)                 |                           |
| Yost4                              | 5.3 (0.5 to 10.1)                 | 1.7 (-1 to 4.3)                   | 2.4 (-1.0 to 5.8)                 | 2.4 (0.4 to 4.3)                  |                           |



|                                                       |                        |                        |                        |                        |      |
|-------------------------------------------------------|------------------------|------------------------|------------------------|------------------------|------|
| Yost5 (Highest)                                       | 6.0 (1.03 to 11.0)     | 3.3 (0.5 to 6)         | 1.2 (-2.7 to 5.1)      | 3.2 (1.2 to 5.3)       |      |
| RUCA (census based)                                   |                        |                        |                        |                        | 0.42 |
| Urban Focused                                         | Ref                    | Ref                    | Ref                    | Ref                    |      |
| Large Rural City/Town                                 | -4.2 (-11.8 to 3.4)    | -0.3 (-4.7 to 4.1)     | 3.3 (-2.1 to 8.7)      | 0.2 (-3.0 to 3.3)      |      |
| Small Rural Town<br>focused/Isolated small<br>rural   | -5.6 (-13.8 to 2.5)    | 0.4 (-4.5 to 5.3)      | 5.3 (-0.5 to 11.2)     | 1.2 (-2.2 to 4.7)      |      |
| AJCC Stage at<br>Diagnosis                            |                        |                        |                        |                        | 0.60 |
| I                                                     | Ref                    | Ref                    | Ref                    | Ref                    |      |
| II                                                    | -8.3 (-14.3 to -2.3)   | -12.1 (-15.7 to -8.4)  | -13.1 (-18.3 to -7.8)  | -11.9 (-14.6 to -9.2)  |      |
| III                                                   | -22.6 (-29.4 to -15.8) | -18.2 (-21.5 to -15.0) | -23.4 (-27.7 to -19.0) | -20.4 (-22.8 to -17.9) |      |
| IV                                                    | -34.6 (-40.7 to -28.5) | -30.4 (-33.2 to -27.6) | -33.8 (-37.6 to -30.1) | -31.7 (-33.8 to -29.6) |      |
| Other/Unknown                                         | -15.1 (-23.2 to -7.0)  | -10.7 (-15.2 to -6.2)  | -18.2 (-24.0 to -12.4) | -13.4 (-16.7 to -10.1) |      |
| Histology                                             |                        |                        |                        |                        | 0.15 |
| NSCLC/Other                                           | Ref                    | Ref                    | Ref                    |                        |      |
| Adenocarcinoma                                        | 3.3 (-1.4 to 8.0)      | 2.2 (-0.2 to 4.7)      | 1.7 (-1.4 to 4.9)      | 2.3 (0.6 to 4.1)       |      |
| Large Cell                                            | -4.5 (-18.2 to 9.2)    | -4.1 (-12.1 to 3.9)    | -0.1 (-10.3 to 10.1)   | -3.5 (-9.4 to 2.4)     |      |
| Squamous                                              | -4.4 (-11.9 to 3.1)    | -0.4 (-3.2 to 2.4)     | -2.3 (-5.8 to 1.2)     | -1.3 (-3.4 to 0.8)     |      |
| Small cell                                            | -8.4 (-16.5 to -0.4)   | -5.6 (-8.7 to -2.5)    | -2.5 (-6.0 to 1.1)     | -4.1 (-6.3 to -1.9)    |      |
| Carcinoids                                            | 8.9 (2.9 to 14.9)      | 4.4 (-1.0 to 9.7)      | 9.3 (-0.4 to 19.1)     | 5.5 (2.0 to 9.0)       |      |
| Clinical Conditions                                   |                        |                        |                        |                        | 0.14 |
| No previous non-lung<br>cancer                        | Ref                    | Ref                    | Ref                    | Ref                    |      |
| Previous non-lung<br>cancer                           | -0.5 (-5.0 to 4.1)     | 4.1 (1.7 to 6.5)       | 2.4 (-0.9 to 5.7)      | 3.1 (1.3 to 4.9)       |      |
| Modified Charlson Co-<br>morbidity Index <sup>c</sup> |                        |                        |                        |                        | 0.10 |
| 0-1 condition                                         | Ref                    | Ref                    | Ref                    | Ref                    |      |
| 2 or more conditions                                  | -0.9 (-4.5 to 2.8)     | -3.9 (-6.0 to -1.7)    | -0.1 (-2.5 to 2.3)     | -2.1 (-3.6 to -0.6)    |      |
| Receipt of Other First<br>Course Therapy <sup>d</sup> |                        |                        |                        |                        |      |
| No Radiation                                          | Ref                    | Ref                    | Ref                    | Ref                    |      |

|                              |                     |                     |                       |                      |       |
|------------------------------|---------------------|---------------------|-----------------------|----------------------|-------|
| Radiation                    | -0.2 (-4.6 to 4.3)  | 2.4 (0.4 to 4.3)    | 2.2 (-0.3 to 4.6)     | 1.8 (0.3 to 3.2)     | 0.96  |
| No Surgery                   | Ref                 | Ref                 | Ref                   | Ref                  |       |
| Surgery                      | 3.8 (-1.6 to 9.3)   | 15.7 (13.0 to 18.4) | 13.4 (9.4 to 17.4)    | 13.4 (11.3 to 15.5)  | 0.002 |
| No Systemic Therapy          | Ref                 | Ref                 | Ref                   | Ref                  |       |
| Systemic Therapy             | 5.3 (1.2 to 9.5)    | 6.6 (4.5 to 8.7)    | 7.8 (5.3 to 10.3)     | 7.0 (5.5 to 8.5)     | 0.66  |
| BMI Status at diagnosis      |                     |                     |                       |                      | 0.68  |
| < 25<br>(Underweight/Normal) | Ref                 | Ref                 | Ref                   | Ref                  |       |
| 25 – 29 (Overweight)         | 1.1 (-2.9 to 5.0)   | 1.7 (-0.3 to 3.6)   | -0.3 (-2.7 to 2.2)    | 1.1 (-0.3 to 2.6)    |       |
| 30 + (Obese)                 | 1.7 (-2.2 to 5.6)   | 3.1 (0.9 to 5.3)    | -0.3 (-3.3 to 2.7)    | 2.0 (0.4 to 3.6)     |       |
| Unknown                      | 0.5 (-40.4 to 41.3) | -6.7 (-21.7 to 8.3) | -13.3 (-24.3 to -2.4) | -9.8 (-19.4 to -0.2) |       |

Abbreviations: Ref = reference group in multivariable model.

<sup>a</sup> Results mutually adjusted for year of diagnosis and healthcare system in addition to all variables listed in the table

<sup>b</sup> The coefficient value represents the number of additional months of survival gained or lost if the corresponding characteristics were present relative to the reference group for that covariate.

<sup>c</sup> Modified Charlson Comorbidity Index excludes HIV/AIDS diagnoses

<sup>d</sup> First Course Therapy as documented in Tumor Registry data
